1 **Extracellular Hsp90 $\alpha$  Detoxifies  $\beta$ -Amyloid Fibrils Through an NRF2 and Autophagy**  
2 **Dependent Pathway**

3  
4 <sup>1</sup>Ayesha Murshid, <sup>1</sup>Benjamin J. Lang, <sup>1,2</sup>Thiago J. Borges, <sup>1</sup>Yuka Okusha, <sup>1</sup>Sachin P. Doshi, <sup>1</sup>Suraya  
5 Yasmine, <sup>3</sup>Joanne Clark-Matott, <sup>1</sup>Reeham Choudhury, <sup>6</sup>Lay-Hong Ang, <sup>5</sup>Maya Woodbury, <sup>5</sup>Tsuneya  
6 Ikezu and <sup>1,4</sup>Stuart K. Calderwood

7  
8 <sup>1</sup>Department of Radiation Oncology, Beth Israel Deaconess Medical Center, Harvard Medical School,  
9 330 Brookline Ave, Boston, MA 02215, USA.

10 <sup>2</sup>Center for Transplantation Sciences, Department of Surgery, Massachusetts General Hospital, Harvard  
11 Medical School, Boston, MA, 02129, USA

12 <sup>3</sup>Neurology, Beth Israel Deaconess Medical Center, Harvard Medical School, Boston, MA 02215, USA.

13 <sup>5</sup>Departments of Pharmacology & Experimental Therapeutics and Neurology, Boston University Medical  
14 Center, 72 East Concord St., L-603, Boston, MA 02118

15 <sup>6</sup>Confocal Imaging Core Facility, Beth Israel Deaconess Medical Center, Harvard Medical School, 330  
16 Brookline Ave, Boston, MA 02215, USA

17  
18 <sup>4</sup>**Correspondence** should be addressed to Dr. Stuart K. Calderwood, BIDMC, 330 Brookline Ave, East  
19 Campus DA-717A, Boston MA 02215. phone 617-667-4240; Fax 617-667-4245; email:  
20 [scalderw@bidmc.harvard.edu](mailto:scalderw@bidmc.harvard.edu).

21 **Key words:** Alzheimer's disease, autophagy, beta-amyloid fibrils, f-A $\beta$ <sub>1-42</sub>, eHsp90 $\alpha$ , NRF2, heat shock  
22 protein 90, eHsp90 $\alpha$ , nitric oxide.

23 **Conflict of Interest.** The authors incurred no conflicts of interest.

24

25

26 **Abstract**

27 We have investigated the role of extracellular Heat shock protein 90 alpha (eHsp90 $\alpha$ ) in conferring  
28 protection of neuronal cells against fibrillary amyloid beta (f-A $\beta_{1-42}$ ) toxicity mediated by microglial  
29 cells. Formation of f-A $\beta_{1-42}$  plaques leads to neurotoxic inflammation, a critical pathological feature of  
30 Alzheimer's Disease. We observed increased uptake and clearance of internalized f-A $\beta_{1-42}$  by microglial  
31 cells treated with eHsp90 $\alpha$ , an effect associated with activation of NRF2 (NF-E2-related factor 2) -  
32 mediated autophagy. eHsp90 $\alpha$  thus mitigated the neuronal toxicity of f-A $\beta_{1-42}$ -activated microglia. In  
33 addition, eHsp90 $\alpha$  facilitated f-A $\beta_{1-42}$  engulfment by microglial cells *in vitro*. In summary, eHsp90 $\alpha$   
34 triggers NRF2-mediated autophagy in microglia and thus protects against the neurotoxic effects of f-A $\beta_{1-}$   
35 42.

36

## 37 **Introduction**

38 Intracellular HSPs are stress proteins that mediate cell survival during the heat shock response (HSR)  
39 through maintenance of protein homeostasis (proteostasis) [1-3]. Such HSPs support survival by guiding  
40 protein folding and modulating protein degradation, thus protecting against proteotoxic stresses such as  
41 heat shock. However, in addition to the intrinsic HSR, the response to proteotoxicity has been shown to  
42 be transcellular in nature and protein stress at one site can modulate the response in cells at distant sites .  
43 It has become clear now that HSPs such as Hsp90 are abundantly secreted into the extracellular  
44 microenvironment and such extracellular HSPs (HSPe) may be important components of the transcellular  
45 HSR. HSPs released in free form or in extracellular vesicles may be able to interact with distant cells to  
46 increase their capacity for proteostasis. In addition to boosting cellular chaperone levels, HSPs may  
47 trigger signaling pathways that influence cell phenotype on encountering receptors in target cells. In  
48 mononuclear phagocytes, the cells under study here, HSPs have been shown to bind to the scavenger  
49 receptors LOX-1 and SREC-1. Ligand- associated LOX-1 is known to activate the factor NFκB through  
50 signaling pathways involving generation of reactive oxygen species (ROS).

51 In the current study, we have examined the role of extracellular Hsp90 (Hsp90e) in the responses of  
52 microglia, brain resident mononuclear phagocytes that are the principal immune cells in the central  
53 nervous system (CNS). We have examined the role of Hsp90e in survival responses of microglia as well  
54 as in their potential role in neuroinflammation during beta amyloid disorder.

55 These activities may have therapeutic relevance for neurodegenerative diseases such as Alzheimer's  
56 Disease (AD) and increasing the expression of HSPs, particularly Hsp90, has been suggested as an  
57 approach to manage the morbidity of AD [8-10]. AD is a progressive neurodegenerative disease  
58 characterized by loss of neuronal cells, accumulation of f-Aβ aggregates and intracellular  
59 hyperphosphorylated tau [11]. Aβ peptides are generated in cells by digestion of the amyloid precursor  
60 protein (APP) protein in membranes by secretases. The peptides vary in their abilities to form amyloid

61 fibrils with Ab<sub>1-42</sub> highly amyloidogenic compared to other products such as Ab<sub>1-40</sub> which has little  
62 known toxicity [12]. Microglial cells, the resident mononuclear phagocytes of the brain, are considered  
63 vital in removing the toxic f-Aβ<sub>1-42</sub> aggregates from the extracellular milieu of neuronal tissues [13].  
64 Following uptake by microglia, f-Aβ<sub>1-42</sub> aggregates are typically transported to the endolysosomal  
65 pathway for degradation. However, this process may initiate microglia to adopt an inflammatory  
66 phenotype that is toxic to surrounding neuronal cells and is ultimately a key component of AD  
67 pathogenesis [14, 15]. These activities of microglia upon f-Aβ<sub>1-42</sub> metabolism therefore constitute a  
68 “double edged sword”; on one hand reducing levels of extracellular f-Aβ<sub>1-42</sub> and on the other initiating a  
69 neurotoxic inflammatory environment.

70 We have investigated whether exogenous delivery of Hsp90α could ameliorate the potentially malign  
71 influence of exogenous f-Aβ fibrils ( f-Aβ<sub>1-42</sub> ) upon microglial cells and subsequent neuronal toxicity.  
72 Indeed, eHsp90α played a significant role in protecting neuronal cells from f-Aβ<sub>1-42</sub> aggregates in the  
73 presence of microglia. The protective activities of eHsp90α appeared to be multifaceted. Of particular  
74 interest, addition of Hsp90α re-directed internalized f-Aβ<sub>1-42</sub> to autophagosomes, an effect likely  
75 facilitated by activation of the NRF2 detoxification pathway and was associated with reduced production  
76 of the nitric oxide (NO) by-product nitrite. In addition, eHsp90α facilitated microglial f-Aβ<sub>1-42</sub> uptake. We  
77 have therefore demonstrated a cytoprotective signaling pathway activated by eHsp90α that is effective in  
78 ameliorating the toxic effects of f-Aβ<sub>1-42</sub>.

79

80

## 81 **Materials and Methods**

82

### 83 **Cell Culture and siRNA construct transfection**

84 Most studies were carried out in BV2 cells, a line of immortalized mouse microglia [16]. Some  
85 confirmatory studies used EOC2, an immortalized microglial cell line derived from the brain of an  
86 apparently normal 10-day-old mouse [17]. Cells were cultured in Dulbecco's Modified Eagles Medium  
87 (DMEM) F12 containing 10% FBS and 1% L-glutamine. BV-2 cells were maintained in DMEM  
88 supplemented by 10% HI FBS and Penicillin-Streptomycin (1000 units/ml), non-essential amino acids,  
89 HEPES, monocyte colony stimulating factor (M-CSF, 20ng/mL, R&D Systems). EOC2 cultures were  
90 maintained in DMEM media supplemented with 10% HI FBS, LADMAC media (20%) and 2ml L-  
91 glutamine. HT22 cells were sourced from INSERT and maintained in MEDIA-X. Primary murine  
92 microglia were cultured and maintained according to [18]. All cell cultures were maintained in a 5% CO<sub>2</sub>  
93 humidified incubator at 37°C.

94 Microglial cells are plated into pre-coated inserts, which fit into wells of 24-well plates. The plating  
95 surface of the insert consists of a porous nylon mesh (3.0 μm), which allows soluble factors secreted by  
96 microglia to become a part of the shared neuron (HT22) -microglia environment.

### 97 **Animals, Chemicals and antibodies.**

98 Pregnant CD-1 mice used to prepare primary microglia were purchased from The Jackson Laboratory.  
99 Mice were housed under standard Laboratory conditions (23±1°C, 55±5% humidity) and had continuous  
100 access to drinking water and food. Neonatal murine microglia were isolated from P0 CD-1 pups using  
101 CD11b microbeads (Ca #130-093-634, Miltenyi Biotec) and their purity was assessed by  
102 immunocytochemistry of myeloid cell markers (Iba-1 and CD11b) according to the published method

103 [19]. The experiments were performed in accordance with *the Guidelines for the Institutional Animal*  
104 *Care and Use of laboratory animals of the Boston University School of Medicine (IACUC #15178)*.

105 Mouse A $\beta$ <sub>1-42</sub> and A $\beta$ <sub>1-40</sub>, FITC tagged mouse A $\beta$ <sub>1-42</sub> and control peptides were purchased from American  
106 Peptides and AnaSpec. Recombinant full-length human Hsp90 $\alpha$  was expressed by baculovirus in Sf9  
107 insect cells using a C-terminal His tag vector, purified by metal affinity chromatography and thus  
108 prepared free of endotoxin contamination [7]. Anti-rabbit Hmox-1 antibodies and anti- $\beta$ -actin mouse  
109 monoclonal antibodies were from Sigma-Aldrich, Anti rabbit NRF2 and Anti-rabbit phospho-NRF2 were  
110 from Abcam.  $\beta$ -tubulin was from Abcam. MAP1-LC3B polyclonal antibodies were from Sigma-Aldrich  
111 and Cell signaling Technology Inc. Sqstm1 (p62) antibodies were from Cell Signaling Technology Inc.  
112 Murine Macrophage colony stimulating factor (M-CSF) was sourced from R&D Systems.

### 113 **Preparation of A $\beta$ fibrils**

114 A $\beta$ <sub>1-42</sub> was dissolved in DMSO (stock 500  $\mu$ M) at room temperature and stored at -20 $^{\circ}$ C. To this A $\beta$   
115 aliquot, we added 10 mM HCl at RT, diluting to a final concentration of 100  $\mu$ M of fA $\beta$ <sub>1-42</sub>. We mixed by  
116 vortex for 15 s, transferred the solution to 37 $^{\circ}$ C and incubated for 24 h. The fA $\beta$ <sub>1-42</sub> solution was then  
117 incubated for 24 h at 37 $^{\circ}$ C.

### 118 **Western Analysis**

119 Cells were washed extensively in ice-cold phosphate-buffered saline, pH 7.4 (PBS) and protein lysates  
120 prepared in RIPA lysis buffer containing 1% NP-40, 0.5% sodium deoxycholate and 0.1% SDS in the  
121 presence of a protease and phosphatase inhibitor cocktails. Protein samples (20 $\mu$ g) were then subjected to  
122 4–15% gradient gel SDS-PAGE using the standard *Cold Spring Harbor Laboratory* protocol and  
123 transferred electrophoretically to PVDF membranes. Filters were then blocked in 5% bovine serum  
124 albumin (BSA) and probed for 2h with either anti-MAPI-LC3B (used at 1:500 dilution), anti- $\beta$ -actin  
125 (1:5000), anti-pNRF2 (S40, 1:4000), anti-NRF2 (1:200), anti HmoxI (1:500), anti p62 (1:1000), or anti  
126 GAPDH (1:300) and antibody-antigen complexes visualized as described [20] using chemiluminescent

127 ECL reagents. The LC3I and LC3II isoforms were distinguished by differential electrophoretic mobility.  
128 Although higher in molecular weight, LC3-II migrates more rapidly in the electrophoretic field due to its  
129 modification with phosphatidylethanolamine.

130 For re-probing blots with multiple antibodies, they were stripped overnight in buffer containing 1.5%  
131 glycine, 0.1% SDS, and 1% Tween 20 at pH 2.2, re-blocked with 5% BSA and reprobed with the next  
132 antibody.

### 133 **Immunofluorescence and confocal microscopy**

134 At the indicated time points, BV-2 and EOC2 cells were washed in ice-cold PBS, pH 7.4, fixed with 4%  
135 para formaldehyde at room temperature, and then permeabilized with 0.1% Triton X-100. Cells were then  
136 blocked with 3% normal goat serum for 1 h at room temperature. Iba1 (Abcam, cat. no. ab120481) and  
137 fluorophore- tagged secondary antibodies were used to fluorescently stain the fixed cells and nuclei were  
138 stained with DAPI. Coverslips were mounted with *Prolong Gold* medium. Slides were scanned using a  
139 Zeiss LSM 810 confocal microscope with Zen software with the respective, appropriate filter sets as  
140 previously described [7]. Neurite growth in Fig 1E was measured using Image J software. Colocalization  
141 was quantified in Zen Software and with Adobe Photoshop software with the help of Channel on/off.

### 142 **Quantification of Nitric oxide production**

---

143 Nitric Oxide (NO) release from cells was measured (using the manufacturer's protocol) in cells incubated  
144 with or without f-AB<sub>1-42</sub> and in other control samples using a Nitric Oxide (total) detection kit, Cat# ADI-  
145 917-020.

### 146 **RNA isolation and RT-qPCR**

147 Total RNA was isolated using the RNeasy Mini kit (*Qiagen*), including on-column DNase digestion to  
148 eliminate DNA (Rnase-Free DNase Set, Qiagen). RNA quantification was then performed using the  
149 Spectrophotometer ND-1000 (NanoDrop). RNA was reverse-transcribed using the iScript cDNA

150 Synthesis Kit (Bio-Rad) or an Applied Biosystems kit. cDNA (20 ng) was amplified using the following  
151 Taqman Gene Expression Assays (ThermoFisher Scientific): cDNA (20 ng) was amplified using the  
152 following Taqman Gene Expression Assays (ThermoFisher Scientific): *Nfe2l2* (Mm00477784\_m1),  
153 *Hmox1* (Mm00516005\_m1), *Nqo1* (Mm01253561\_m1), *Sqstm1* (Mm01070495\_m1) and *18s*  
154 (Mm03928990\_g1). All qPCR reactions were performed in a *StepOne Plus Real-Time PCR System*  
155 (Applied Biosystems). The relative mRNA levels were calculated using the comparative Ct method, with  
156 18S as the internal control.

### 157 **Statistical analysis**

158 We determined differences between two specific points using the Student's t-test. To determine  
159 differences between three or more groups, we used the one-way analysis of variance (ANOVA) test, with  
160 Tukey post hoc tests. The level of significance was set at  $p < 0.05$ . All analyses were performed using the  
161 software Prism 6 (GraphPad Software Inc.).

162

163



## 164 **Results**

### 165 **Extracellular Hsp90 $\alpha$ mitigates Fibrillar Amyloid beta-induced Neurotoxicity *in vitro***

166 To test whether eHsp90 $\alpha$  could protect neurons from the inflammatory toxicity of f-A $\beta_{1-42}$  -activated  
167 microglia we co-treated murine microglial BV-2 and EOC2 cells with purified Hsp90 $\alpha$  and/or freshly  
168 prepared f-A $\beta_{1-42}$  and assessed the viability of adjacent neuronal HT22 cells potentially exposed to  
169 secreted microglial products via transwell culture preparations. BV-2 cells pre-incubated with FITC-  
170 f-A $\beta_{1-42}$  mediated toxicity towards the distant neuronal HT22 cells as indicated by extensive loss of  
171 microtubule-containing processes, a morphological measure of neuron cell viability [21] (Fig. 1A, B).  
172 Within 72 h of f-A $\beta_{1-42}$  incubation, many of the neuronal cells (HT22) had lost their elongated processes  
173 (Fig. 1B). In contrast, when HT22 cells were co-cultured with BV-2 cells that had been treated with both  
174 f-A $\beta_{1-42}$  and eHsp90 $\alpha$  in the top well of the transwell culture dish, the majority of the HT22 survived with  
175 neurite lengths comparable to those in the non-treated control, suggesting protection by the chaperone  
176 (Fig. 1D). eHsp90 $\alpha$  treatment alone did not significantly impact neurite outgrowth (Fig. 1C). The extent  
177 of neurite outgrowth was quantified and is shown in Fig. 1E. Similar effects of exposure to f-A $\beta_{1-42}$   
178 without or with eHsp90 $\alpha$  were also found upon co-culture of HT22 neuronal cells with EOC2 microglial  
179 cells (Suppl. Fig. 1).

### 180 **Nitric Oxide secretion by microglia is reduced by eHsp90 $\alpha$**

181 It was recently reported that microglia can express high levels of inducible nitric oxide synthase (iNOS)  
182 upon internalization of f-A $\beta_{1-42}$  and such elevated iNOS leads to an increase in NO secretion [22]. Such  
183 high levels of NO become highly toxic after reaction with oxygen to form peroxynitrate (ONOO $^-$ ),  
184 conferring lethal DNA damage to adjacent cells. Both increased iNOS expression and increased NO  
185 production have been shown to be contributing factors in f-A $\beta$ -induced neurotoxicity [22, 23]. We  
186 therefore measured NO secretion by BV-2 cells treated with f-A $\beta_{1-42}$ , eHsp90 $\alpha$  or co-treated with  
187 eHsp90 $\alpha$  and f-A $\beta_{1-42}$  and observed that while f-A $\beta_{1-42}$  increased levels of NO secretion by

188 approximately 4-fold, samples co-treated with eHsp90 $\alpha$  and f-A $\beta$ <sub>1-42</sub> produced comparatively lower NO  
189 levels (Fig. 2A). These data suggested that one potential mechanism by which exposure to eHsp90 $\alpha$  might  
190 reduce f-A $\beta$ <sub>1-42</sub>- associated neurotoxicity could be induction of the anti-oxidant response pathway  
191 through NRF2 activation, with increased induction of its anti-oxidative gene targets and subsequent  
192 reduction in NO levels [24]. To further test this hypothesis, *Nfe2l2* mRNA levels encoding the NRF2  
193 protein were knocked down in BV-2 cells using siRNA and cells were then incubated with f-A $\beta$ <sub>1-42</sub>,  
194 eHsp90 $\alpha$  or co-treated with eHsp90 $\alpha$  and f-A $\beta$ <sub>1-42</sub>. While exposure to eHsp90 $\alpha$  reduced NO accumulation  
195 by f-A $\beta$ <sub>1-42</sub> in the scrambled control cells, this sparing effect was attenuated in the *Nfe2l2* siRNA sample,  
196 supporting a role for NRF2 in the protective properties of eHsp90 $\alpha$  against f-A $\beta$ <sub>1-42</sub>-associated NO  
197 production (Fig. 2B).

#### 198 **eHsp90 $\alpha$ activates the NRF2-antioxidant response element signaling pathway in BV-2 cells**

199 Activation of NRF2 and its antioxidant gene products such as Hmox1 (Heme Oxygenase 1), NQO1  
200 (NAD [P] H:quinone oxidoreductase, Prdx1 (peroxiredoxin), leads to protection of cells from  
201 inflammatory damage through ROS (reactive oxygen species) [25]. We therefore asked whether Hsp90 $\alpha$   
202 could induce NRF2 and its antioxidant gene products and thus deter microglia from f-A $\beta$ <sub>1-42</sub>- mediated  
203 toxicity. To test this possibility, we incubated BV-2 cells with f-A $\beta$ <sub>1-42</sub>, eHsp90 $\alpha$  or eHsp90 $\alpha$  + f-A $\beta$ <sub>1-42</sub> and  
204 assayed for indicators of altered NRF2 activity. We first observed increases in mRNA levels of *Nfe2l2* in  
205 cells treated with eHsp90 $\alpha$  + f-A $\beta$ <sub>1-42</sub> or eHsp90 $\alpha$  alone, but only a mild effect of f-A $\beta$ <sub>1-42</sub> alone (Fig. 3A).  
206 We also observed upregulation of known NRF2 regulated genes, *Hmox1* and *Nqo1* mRNA in microglia  
207 incubated with eHsp90 $\alpha$  (Fig. 3B, C).

208 We next demonstrated an increase in the active, modified form of NRF2, phospho-NRF2 (S40) and total  
209 levels of NRF2 protein in BV-2 cells incubated with both f-A $\beta$ <sub>1-42</sub> and eHsp90 $\alpha$  (Fig. 3D). Hmox1 protein  
210 expression was also increased in cells incubated with eHsp90 $\alpha$  (Fig. 3E).

## 211 **eHsp90 $\alpha$ increases the uptake and clearance of f-A $\beta$ <sub>1-42</sub> by microglial cells**

212 Next, we tested the hypothesis that addition of Hsp90 $\alpha$  might produce additional beneficial effects by  
213 increasing phagocytosis of f-A $\beta$ <sub>1-42</sub>, thus removing some of the toxic aggregates from the medium. We  
214 therefore examined the effect of eHsp90 $\alpha$  on uptake and accumulation of fluorescence-labeled f-A $\beta$ <sub>1-42</sub> in  
215 BV-2 and primary cultured murine microglia. Addition of eHsp90 $\alpha$  at 10 $\mu$ g/ml markedly increased  
216 uptake of 2.5 $\mu$ M of f-A $\beta$ <sub>1-42</sub> in BV-2 (Fig. 4A-B), primary microglia (Fig. 4C-D) and EOC2 cells (Suppl.  
217 Fig. 2). Primary microglia were treated with Alexa-555-labelled eHsp90 $\alpha$  (Fig. 4C-D). Co-localization of  
218 Alexa-555-Hsp90 $\alpha$  and FITC-f-A $\beta$ <sub>1-42</sub> after 2 h incubation with primary microglia was observed  
219 suggesting that eHsp90 $\alpha$  may facilitate f-A $\beta$ <sub>1-42</sub> uptake (Fig. 4D). We used anti-Iba1 antibody to mark the  
220 microglial population in primary culture. Iba1 is a microglia-macrophage specific calcium-binding  
221 protein.

222 To determine the influence of eHsp90 $\alpha$  on the fate of internalized FITC labeled f-A $\beta$ <sub>1-42</sub> after  
223 internalization in microglia, we incubated BV-2 cells (Fig. 5A-B) and EOC2 cells (Suppl. Fig. 3) with  
224 FITC- f-A $\beta$ <sub>1-42</sub> for 19 and 24 h at 37 $^{\circ}$ C, respectively. Samples co-treated with eHsp90 $\alpha$  had a faster rate of  
225 intracellular FITC depletion potentially suggesting higher levels of f-A $\beta$ <sub>1-42</sub> degradation. An increased rate  
226 of cytosolic f-A $\beta$ <sub>1-42</sub> loss was also observed in the early periods upon addition of eHsp90 $\alpha$  within 19 h of  
227 treatment (Fig. 5). Increased f-A $\beta$ <sub>1-42</sub> uptake was observed within 9.5 h in the eHsp90 $\alpha$  co-treated sample  
228 compared to f-A $\beta$ <sub>1-42</sub> alone. This pattern was consistent with the effects observed in EOC2 cells, where  
229 higher levels of f-A $\beta$ <sub>1-42</sub> were observed within 2 h of treatment (Suppl. Fig. 2), yet at 24 h the f-A $\beta$ <sub>1-42</sub>  
230 FITC signal was observed to be reduced in the experimental group treated with both f-A $\beta$ <sub>1-42</sub> and eHsp90 $\alpha$   
231 compared to f-A $\beta$ <sub>1-42</sub> alone (Suppl. Fig. 3). When considered together the data suggested that, similar to  
232 the BV-2 cells, the EOC2 cells also appeared to exhibit faster rates of f-A $\beta$ <sub>1-42</sub> uptake and metabolism  
233 when co-treated with eHsp90 $\alpha$ .

## 234 **eHsp90 $\alpha$ promotes autophagosome-mediated clearance of f-A $\beta$ <sub>1-42</sub> by microglial cells**

235 To further investigate mechanisms through which eHsp90 $\alpha$  might modulate the intracellular fate of f-A $\beta$ <sub>1-42</sub>.  
236 <sub>42</sub>, we examined the intracellular localization of the fibrils after uptake and asked how this was impacted  
237 by co-treatment with eHsp90 $\alpha$ . It has been previously shown that f-A $\beta$ <sub>1-42</sub> can be degraded by the  
238 autophagy pathway in some circumstances [26]. We found that after uptake, f-A $\beta$ <sub>1-42</sub> was localized to  
239 regions containing both the lysosomal marker LAMP1 (Fig. 6A and E) and the autophagosome marker  
240 MAP1-LC3 (Fig. 6B and E) in BV-2 cells after 2 h of treatment with FITC-f-A $\beta$ <sub>1-42</sub>. However, upon co-  
241 treatment with eHsp90 $\alpha$  the proportion of cells that exhibited co-localization of FITC-f-A $\beta$ <sub>1-42</sub> with  
242 LAMP1 was decreased (Fig. 6C and E), while cells with colocalization of f-A $\beta$ <sub>1-42</sub> and autophagosomal  
243 MAP1-LC3 marker was increased, by at least 3-fold (Fig. 6D and E). These experiments therefore  
244 suggested that eHsp90 $\alpha$  redirects the fibrils towards the autophagosomal compartment.

245 We also observed increased MAP1-LC3B-II protein expression in BV-2 cells incubated with f-A $\beta$ <sub>1-42</sub> and  
246 eHsp90 $\alpha$ , potentially suggesting increased autophagy under these conditions (Fig. 6F). Intracellular levels  
247 of MAP1-LC3B-II are generally correlated with the numbers of autophagosomal puncta [27]. When  
248 pretreated with lysosomal inhibitor ammonium chloride for 2 h, levels of MAPI-LC3B-II, (the  
249 autophagosome-associated, lipidated form of MAP1-LC3 that accumulates due to inhibition of  
250 lysosomal degradation), were increased in cells treated with both f-A $\beta$ <sub>1-42</sub> and eHsp90 $\alpha$  (Fig. 6G).

## 251 **eHsp90 $\alpha$ induces increased levels of autophagy proteins p62 /SQSTM1) and MAPI-LC3B in** 252 **microglia**

253 Among candidate intermediates in the autophagy pathway, MAPI-LC3B and p62 (encoded by *Sqstm1*)  
254 play particularly significant roles in the processing of ubiquitinated proteins targeted for degradation  
255 [28]. We therefore next examined the expression of MAPI-LC3B and p62 after eHsp90 $\alpha$  treatment in BV-  
256 2 cells (Fig. 7 A, C). As NRF2 has recently been linked to autophagy, we hypothesized that this factor  
257 might function as a regulator of p62 and LC3 expression to mediate the observed increases in indicators  
258 of autophagy and increased clearance of fA $\beta$ <sub>1-42</sub>. To test this possibility, *Nfe2l2* transcript levels were

259 reduced by RNA interference (Fig. 7 A, C). Relative levels of NRF2 proteins in BV-2 cells were  
260 increased by eHsp90 $\alpha$  treatment but not by exposure to f-A $\beta$ <sub>1-42</sub> (Fig. 7A). LC3II levels in these samples  
261 were increased by the eHsp90 $\alpha$  treatments but not by f-A $\beta$ <sub>1-42</sub>, and were reduced in samples transfected  
262 with *Nfe2l2* mRNA-targeting siRNA (Fig. 7A). f-A $\beta$ <sub>1-42</sub> treatment increased LC3I protein levels but not  
263 LC3II levels (Fig. 7A).

264 At the mRNA level, eHsp90 $\alpha$  treatment increased the levels of the p62 encoding mRNA of *Sqstm1* in  
265 BV-2 cells, with or without f-A $\beta$ <sub>1-42</sub> while exposure to the microfibrils alone had minimal effects (Fig.  
266 7B). It might be significant that f-A $\beta$ <sub>1-42</sub> alone produced small increases in NRF2 and p62 mRNA,  
267 perhaps suggesting that the microglia were attempting to mount a homeostatic response to the toxic  
268 aggregates and that such a response could be amplified by eHsp90 $\alpha$  treatment (Fig. 3A, 7B). To control  
269 for potential effects of NRF2 knockdown on f-A $\beta$ <sub>1-42</sub> uptake, BV-2 cells were transfected with *Nfe2l2*-  
270 targeting siRNA, treated with FITC-f-A $\beta$ <sub>1-42</sub> and analyzed by fluorescence microscopy after 72 h. We did  
271 not detect significant changes in uptake in cells depleted of NRF2 (Suppl. Fig. 4). These data therefore  
272 suggested that eHsp90 $\alpha$ -mediated changes in f-A $\beta$ <sub>1-42</sub> uptake and entry into the autophagy pathways were  
273 independently mediated events. eHsp90 $\alpha$  treatment also led to increased levels of p62 proteins with or  
274 without f-A $\beta$ <sub>1-42</sub> exposure, while f-A $\beta$ <sub>1-42</sub> alone produced minimal effects (Fig. 7C). eHsp90 $\alpha$ -induced p62  
275 was abrogated in cells transfected with *Nfe2l2*-targeting siRNA (Fig. 7C), again suggesting a primary role  
276 for this transcription factor in expression of autophagy intermediates.

277

## 278 Discussion

279 The pathology of AD involves both intra- and extracellular A $\beta$  deposition to neurons [29]. Intracellular  
280 A $\beta$  plaques could be reduced by overexpression of HSPs such as Hsp40 and Hsp70, both of which bind to  
281 oligomers in the intra-neuronal space [30]. It has, however been a challenge to derive approaches to  
282 remove extracellular A $\beta$  plaques from the brain, which are initially formed outside the nucleus and  
283 become neurotoxic [31]. Considering the chaperoning effects of Hsp90 $\alpha$  and its role in internalizing  
284 antigens in immune cells, we hypothesized that eHsp90 $\alpha$  might play a role in removing extracellular A $\beta$   
285 plaques in treatment of AD [7, 20].

286 Recent studies suggested a dominant role for microglia, in the progression of AD [32-34]. Microglia form  
287 a lineage originated from the yolk sac, which is distinct from other mononuclear phagocytes, and can play  
288 homeostatic roles in AD, by surrounding and removing A $\beta$  plaques, apoptotic cells and debris [33, 34].  
289 However, prolonged microglial activation may enhance the neurodegenerative phenotype of these cells in  
290 the pathology of AD, mediating neurotoxicity and loss of synapses and neurons [14]. Here we have  
291 demonstrated that the inflammatory neurotoxicity of f-A $\beta$ <sub>1-42</sub> exerted by microglia could be reduced in  
292 the presence of eHsp90 $\alpha$  (Fig. 1). Our results suggested that eHsp90 $\alpha$  may play a vital role both in  
293 engulfment and processing of extracellular f-A $\beta$ <sub>1-42</sub> aggregates (Fig.4). eHsp90 $\alpha$  is internalized in a  
294 receptor-dependent pathway by phagocytic cells such as dendritic cells and macrophages [35, 36].  
295 eHsp90 $\alpha$  can bind to multiple receptors expressed in both non-immune cells and immune cells [37],  
296 including, but not limited to, LRP-1, SREC-I, LOX-1, and Feel-1/Stabilin-1 [6, 7, 36, 38, 39]. Other  
297 investigators have shown that non-fibrillar A $\beta$  can be taken up by macrophages and microglia by receptor  
298 mediated phagocytosis [40]. Here we observed that eHsp90 $\alpha$  causes enhanced uptake of f-A $\beta$ <sub>1-42</sub> in  
299 microglia (Fig. 5).

300 In addition to a method to recycle their own components during nutrient deprivation, cells utilize  
301 autophagy to process extracellular components such as dead cells and invading pathogens after

302 phagocytosis [41, 42]. In this study, we demonstrated that the processing of extracellular f-A $\beta$ <sub>1-42</sub> by  
303 microglia is switched towards the autophagy pathway when Hsp90 $\alpha$  is added to the extracellular media  
304 (Fig.6). It had been shown that the autophagy pathway is beneficial for AD, and that f-A $\beta$ <sub>1-42</sub> undergoes  
305 autophagy mediated processing in microglia [43]. However, microglial autophagy appears to be defective  
306 in some AD patients, a loss which may contribute to activation of microglia via the inflammasome [26].  
307 We also observed that Hsp90 $\alpha$  could increase MAPI-LC3B expression in microglia, and was found in  
308 MAPI-LC3B containing autophagosomes (Fig. 6). We observed a significant increase in MAPI-LC3B  
309 expression in cells with Hsp90 $\alpha$  only and f-A $\beta$ <sub>1-42</sub> + Hsp90 $\alpha$ , evidence that autophagy plays a role in  
310 Hsp90 $\alpha$  mediated processing of internalized f-A $\beta$ <sub>1-42</sub> in microglia (Fig. 6). In autophagy, cytosolic MAPI-  
311 LC3B becomes conjugated to phosphatidylethanolamine, forming LC3BII on the autophagosomal  
312 membrane until this molecule fuses with lysosomes [44]. The other adaptor protein involved in the  
313 autophagy pathway, p62 / Sqstm1 is known to interact with LC3BII and facilitate ubiquitinated protein  
314 targeting to autophagosomes and degradation [45]. We observed increases in both *LC3B* and *p62 / Sqstm1*  
315 mRNA and protein expression in the presence of eHsp90 $\alpha$  suggesting the role of increases in these  
316 proteins in initiating this process (Fig. 7).

317 A central role in the response of microglia to Hsp90 $\alpha$  appeared to be played by NRF2, which is induced  
318 and activated by the chaperone in microglia (Fig 3). Although NRF2 is classically activated by oxidative  
319 stress, such a mechanism seems unlikely here from our current understanding of the effects of  
320 extracellular Hsp90 $\alpha$ . The mechanisms by which Hsp90 $\alpha$  activate NRF2 are therefore unclear, but may  
321 involve downstream signaling cascades emanating from liganded HSP receptors [35]. Decreases in NO  
322 levels under conditions of activated NRF2 might be related to the known antagonism between this factor  
323 and NF $\kappa$ B, the key activator of inflammatory transcription [46]. Activated NRF2 can inhibit NF $\kappa$ B-  
324 mediated expression of *iNOS* as well as down-regulating inflammatory genes such as *COX-2*, *TNF $\alpha$*  and  
325 *IL1 $\beta$*  [46]. Recently it was shown that inflammatory responses induced by f-A $\beta$ <sub>1-42</sub> fibrils in microglia are  
326 decreased in these cells by induction of autophagy [47].

327 Our experiments therefore demonstrate that eHsp90 $\alpha$  can modulate the processing of f-A $\beta$ <sub>1-42</sub> in  
328 microglia while mitigating the resulting oxidative burst. The mechanisms involved included induction of  
329 NRF2 and the oxidative stress response and recruitment of the autophagy pathway. These data may  
330 suggest potentially novel uses for HSPs in future treatment of AD.

331



332 **Acknowledgements**

333 This research was supported by NIH research grants RO-1CA047407, RO-1CA119045 and RO-  
334 1CA094397 (for SKC) and RF1-AG054199 and R01-AG066429 (TI). A.M. is a recipient of a Harvard  
335 JCRT award and TJB was a recipient of a CAPES-PNPD fellowship. The authors alone are responsible  
336 for the content and writing of the paper. We thank the Department of Radiation Oncology, Beth Israel  
337 Deaconess Medical Center for interest and support.

338 <sup>1</sup>To whom correspondence should be addressed: Stuart K. Calderwood, Beth Israel Deaconess Medical  
339 Center, Harvard Medical School, 330 Brookline Ave, East Campus, DA-717A, Boston, MA 02215, USA.  
340 E-mail: [scalderw@bidmc.harvard.edu](mailto:scalderw@bidmc.harvard.edu)

341 **Data Availability**

342 All data relevant to the manuscript are contained in the text figures and Supplementary data and any  
343 additional data will be made available.

344

345

346 **Figure Legends**

347 **Figure 1. eHsp90 $\alpha$  mitigates Fibrillar Amyloid  $\beta$  induced Neurotoxicity.** (A-D). HT22 hippocampal  
348 neuronal cells were grown on coverslips in the bottom layer of a transwell culture dish. BV-2 cells were  
349 then added to the top layer of the transwell, and incubated with: (A) no ligand, (B) fibrillar f-A $\beta_{1-42}$   
350 (2 $\mu$ M), (C) Hsp90 $\alpha$  (10 $\mu$ g/ml) and (D) f-A $\beta_{1-42}$  + Hsp90 $\alpha$  (D) for 72 h. After the 72 h incubation, HT22  
351 cells from the bottom wells were then fixed with 4% para formaldehyde and then permeabilized with  
352 0.1% Triton X-100 before staining with anti  $\beta$ -tubulin antibodies. Stained cells on coverslips were then  
353 examined by confocal microscopy. (E)  $\beta$ -tubulin stained neurite outgrowth was measured using image J.  
354 scale bar = 5 $\mu$ m A total of 100 cells were counted in each sample. Cartoon created with *BioRender.com*.  
355 Experiments were repeated three times with similar results.

356 **Figure 2. Nitric Oxide secretion induced by microglial exposure to fibrillar A $\beta$  is reduced by**  
357 **eHsp90 $\alpha$ .** (A) BV-2 cells were incubated with the indicated ligands or with vehicle (ctl) for 4-6 h. Control  
358 peptide was A $\beta_{1-40}$ . NO secretion to the medium was then quantitated using a Pierce assay kit, according  
359 to manufacturer's protocol. (B) BV-2 cells were transfected with scrambled control (*scr*) RNA or *Nfe2l2*  
360 siRNA for 72 h. Cells were then incubated with indicated ligands or not (ctl) for 6 h and NO secretion  
361 was measured as above. Experiments were repeated 3 times with similar results.

362 **Figure 3. eHsp90 $\alpha$  treatment activates the NRF2-antioxidant response element signaling pathway in**  
363 **BV-2 cells.** (A-C) BV-2 cells were incubated with eHsp90 $\alpha$  for the indicated times and then total RNA  
364 was extracted and assayed by RT-qPCR. Relative *Nfe2l2* (A), *Hmox1* (B) and *Nqo1* (C) mRNA  
365 expression was quantified and normalized to 18S and represented as fold-change to control or 0 h  
366 timepoint. (D, E) BV-2 cells were incubated with A $\beta$ , eHsp90 $\alpha$  or eHsp90 $\alpha$  plus A $\beta$  for 4 h. Total cell  
367 lysates were collected, separated using SDS-PAGE and analyzed by immunoblot. In D, the filters were  
368 probed with anti-pNRF2 antibodies then stripped and probed sequentially for NRF2, and  $\beta$ -actin (loading  
369 control). In E, filters were probed after immunoblot with anti-Hmox1 antibodies then stripped and probed

370 sequentially for pNRF2, NRF2, and GAPDH (loading control). Experiments were repeated 3 times with  
371 similar results.

372 **Figure 4. eHsp90 $\alpha$  increases uptake of FITC-f-A $\beta$ <sub>1-42</sub> by microglia.** (A, B) BV-2 cells were incubated  
373 with 2 $\mu$ M FITC-f-A $\beta$  (green) for 2 h. Cells were then fixed with 4% paraformaldehyde, permeabilized  
374 (0.1% Triton X100) and stained with DAPI (blue). FITC-f-A $\beta$ <sub>1-42</sub> was detected by its intrinsic  
375 fluorescence. scale bar = (5  $\mu$ m ). (C, D) Primary microglia were incubated with 2 $\mu$ M FITC-f-A $\beta$  (green)  
376 and  $\pm$  Alexa555-Hsp90 $\alpha$  (red) for 2 h. Cells were then fixed, permeabilized, stained with DAPI (blue).  
377 FITC-f-A $\beta$ <sub>1-42</sub> and Alexa555-Hsp90 $\alpha$  were detected by their intrinsic fluorescence. Experiments were  
378 repeated twice, and 100 cells were counted from each sample for each experiment, scale bar = (X).

379 **Figure 5. Altered clearance of FITC-f-A $\beta$ <sub>1-42</sub> fibrils in microglia by eHsp90 $\alpha$ .** (A, B). BV-2 cells were  
380 incubated with FITC-f-A $\beta$ <sub>1-42</sub> (green, 2 $\mu$ M)  $\pm$  Hsp90 $\alpha$  for 24 h. Cells were then fixed (4% para  
381 formaldehyde), permeabilized (0.1% Triton X-100) and stained with DAPI (blue) prior to confocal  
382 microscopy. (C) BV-2 cells were incubated with 2 $\mu$ M FITC-f-A $\beta$ <sub>1-42</sub> and/or 10 $\mu$ g/ml of eHsp90 for up to  
383 19.5 h. Cells were then fixed, permeabilized and stained with DAPI (blue) as in A and B prior to  
384 determination of fluorescence intensity. Scale bar = X. Experiments were repeated 3 times, reproducibly.

385 **Figure 6. FITC-f-A $\beta$ <sub>1-42</sub> fibrils are localized in MAP1-LC3B marked autophagosomes in the presence**  
386 **of eHsp90 $\alpha$ .** (A) BV-2 cells were incubated with FITC-f-A $\beta$  (2 $\mu$ M, green) for 2 h. Cells were then fixed,  
387 permeabilized and stained with anti-LAMP1 antibodies (red) and DAPI (blue) prior to confocal  
388 microscopy. (B) BV-2 cells were incubated with FITC-f-A $\beta$  (2 $\mu$ M, green) as in A. Cells were then fixed,  
389 permeabilized and probed by immunofluorescence with MAPI-LC3B antibodies (red) and DAPI (blue).  
390 (C) BV-2 cells were incubated with FITC-f-A $\beta$  (2 $\mu$ M, green) and eHsp90 $\alpha$  (10 $\mu$ g/ml) for 2 h. Cells were  
391 then processed as in A, B and then stained with anti LAMP1 antibodies (red) and DAPI (blue). (D) BV-2  
392 cells were incubated with FITC-f-A $\beta$  and eHsp90 $\alpha$  as in A and then processed as in A. Cells were probed  
393 by immunofluorescence with anti-MAP1-LC3B ab (red) and DAPI (blue). MAP1-LC3B was thus

394 detected by secondary fluorescent antibodies and FITC-f-A $\beta_{1-42}$  by its intrinsic fluorescence. (E)  
395 Quantitation of the relative levels of colocalized FITC-f-A $\beta_{1-42}$  and either LAMP1 or LC3 by  
396 fluorescence intensity. (F) BV-2 cells were treated with f-A $\beta_{1-42}$  (2 $\mu$ M)  $\pm$  eHsp90 $\alpha$  (10 $\mu$ g/ml) or vehicle  
397 for 2 h. Cells were then lysed and lysates containing equal amounts of protein were analyzed by SDS-  
398 PAGE prior to electro-transfer and immunoblot with MAPI-LC3BI antibodies. The PVDF membrane  
399 was stripped and blotted with anti-GAPDH antibodies as loading control. (G) BV-2 cells were pretreated  
400 with NH<sub>4</sub>Cl for 2 h and then incubated with or without f-A $\beta_{1-42}$  and eHsp90 $\alpha$  as in F. Anti-MAPI-LC3B  
401 antibodies were used to detect MAPI-LC3B expression in the immunoblots. Samples containing equal  
402 amounts of protein were loaded and equal loading was confirmed by the anti-GAPDH antibody  
403 immunoblot. Experiments were repeated at least three times, reproducibly.

404 **Figure 7. eHsp90 $\alpha$  induced autophagy involves activation of NRF2 and subsequent expression of**  
405 **NRF2-regulated gene products.** (A) BV-2 cells were transfected with either *scr* or *Nfe2l2* siRNA for 72  
406 h. Cells were then incubated with f-A $\beta_{1-42}$ , eHsp90 $\alpha$  and f-A $\beta_{1-42}$  + eHsp90 $\alpha$  for 4 h. Total cell lysates  
407 were collected and samples with equal amount of protein were separated using SDS-PAGE before  
408 transfer to PVDF membrane. Relative levels of the indicated proteins were determined by immunoblot  
409 using anti-MAPI-LC3B, and membranes then stripped and probed sequentially for NRF2 and GAPDH.  
410 (B) BV-2 cells were incubated with either vehicle control, f-A $\beta_{1-42}$ , eHsp90 $\alpha$   $\pm$  f-A $\beta_{1-42}$  or eHsp90 $\alpha$  alone  
411 for 4 h. Total RNA was then extracted, and real-time qPCR was performed using primers to detect the  
412 *Sqstm1* transcript. *Sqstm1* mRNA levels were measured and represented relative to the amount of *18s*  
413 RNA. (C) BV-2 cells were transfected with either *Scr* or *Nfe2l2* siRNA for 72 h. Cells were then  
414 incubated with the indicated ligands for 4 h. Cell lysates were then collected and proteins separated by  
415 SDS-PAGE. p62 and GAPDH protein levels were detected sequentially by immunoblot using anti-p62  
416 and anti-GAPDH antibodies. Experiments were performed three times with reproducibility.

417

## 418 References

- 419 1. Calderwood, S.K., A. Murshid and T. Prince, *The shock of aging: molecular chaperones and the*  
420 *heat shock response in longevity and aging--a mini-review*. *Gerontology*, 2009. **55**(5): p. 550-8.
- 421 2. Hartl, F., *Molecular Chaperones in cellular protein folding*. *Nature*, 1996. **381**: p. 571-580.
- 422 3. Martin, J. and F.U. Hartl, *Molecular chaperones in cellular protein folding*. *Bioessays*, 1994. **16**(9):  
423 p. 689-92.
- 424 4. Calderwood, S.K. and L. Neckers, *Hsp90 in Cancer: Transcriptional Roles in the Nucleus*. *Adv*  
425 *Cancer Res*, 2016. **129**: p. 89-106.
- 426 5. Calderwood, S.K., J. Gong and A. Murshid, *Extracellular HSPs: The Complicated Roles of*  
427 *Extracellular HSPs in Immunity*. *Front Immunol*, 2016. **7**: p. 159.
- 428 6. Murshid, A., J. Gong and S.K. Calderwood, *The role of heat shock proteins in antigen cross*  
429 *presentation*. *Front Immunol*, 2012. **3**: p. 63.
- 430 7. Murshid, A., J. Gong and S.K. Calderwood, *Heat shock protein 90 mediates efficient antigen cross*  
431 *presentation through the scavenger receptor expressed by endothelial cells-I*. *J Immunol*, 2010.  
432 **185**(5): p. 2903-17.
- 433 8. Poulaki, V., et al., *Inhibition of Hsp90 attenuates inflammation in endotoxin-induced uveitis*.  
434 *FASEB J*, 2007. **21**(9): p. 2113-23.
- 435 9. Calderwood, S.K. and A. Murshid, *Molecular Chaperone Accumulation in Cancer and Decrease in*  
436 *Alzheimer's Disease: The Potential Roles of HSF1*. *Front Neurosci*, 2017. **11**: p. 192.
- 437 10. Tonkiss, J. and S.K. Calderwood, *Regulation of heat shock gene transcription in neuronal cells*. *Int*  
438 *J Hyperthermia*, 2005. **21**(5): p. 433-44.
- 439 11. Lorenzo, A. and B.A. Yankner, *Amyloid fibril toxicity in Alzheimer's disease and diabetes*. *Ann N Y*  
440 *Acad Sci*, 1996. **777**: p. 89-95.
- 441 12. Vadukul, D.M., O. Gbajumo, K.E. Marshall, and L.C. Serpell, *Amyloidogenicity and toxicity of the*  
442 *reverse and scrambled variants of amyloid-beta 1-42*. *FEBS Lett*, 2017. **591**(5): p. 822-830.
- 443 13. Yamamoto, M., T. Kiyota, S.M. Walsh, J. Liu, J. Kipnis, and T. Ikezu, *Cytokine-mediated inhibition*  
444 *of fibrillar amyloid-beta peptide degradation by human mononuclear phagocytes*. *J Immunol*,  
445 2008. **181**(6): p. 3877-86.
- 446 14. Krasemann, S., et al., *The TREM2-APOE Pathway Drives the Transcriptional Phenotype of*  
447 *Dysfunctional Microglia in Neurodegenerative Diseases*. *Immunity*, 2017. **47**(3): p. 566-581 e9.
- 448 15. Clayton, K.A., A.A. Van Enoo and T. Ikezu, *Alzheimer's Disease: The Role of Microglia in Brain*  
449 *Homeostasis and Proteopathy*. *Front Neurosci*, 2017. **11**: p. 680.
- 450 16. Stansley, B., J. Post and K. Hensley, *A comparative review of cell culture systems for the study of*  
451 *microglial biology in Alzheimer's disease*. *J Neuroinflammation*, 2012. **9**: p. 115.
- 452 17. Timmerman, R., S.M. Burm and J.J. Bajramovic, *An Overview of in vitro Methods to Study*  
453 *Microglia*. *Front Cell Neurosci*, 2018. **12**: p. 242.
- 454 18. Woodbury, M.E., et al., *miR-155 Is Essential for Inflammation-Induced Hippocampal Neurogenic*  
455 *Dysfunction*. *J Neurosci*, 2015. **35**(26): p. 9764-81.
- 456 19. Ikezu, S., et al., *Inhibition of colony stimulating factor 1 receptor corrects maternal*  
457 *inflammation-induced microglial and synaptic dysfunction and behavioral abnormalities*. *Mol*  
458 *Psychiatry*, 2020.
- 459 20. Murshid, A., J. Gong, T. Prince, T.J. Borges, and S.K. Calderwood, *Scavenger Receptor SREC-I*  
460 *Mediated Entry of TLR4 into Lipid Microdomains and Triggered Inflammatory Cytokine Release in*  
461 *RAW 264.7 Cells upon LPS Activation*. *PLoS One*, 2015. **10**(4): p. e0122529.

- 462 21. Sarma, T., A. Koutsouris, J.Z. Yu, A. Krbanjevic, T.J. Hope, and M.M. Rasenick, *Activation of*  
463 *microtubule dynamics increases neuronal growth via the nerve growth factor (NGF)- and*  
464 *Galphas-mediated signaling pathways.* J Biol Chem, 2015. **290**(16): p. 10045-56.
- 465 22. Sierra, A., et al., *Expression of inducible nitric oxide synthase (iNOS) in microglia of the*  
466 *developing quail retina.* PLoS One, 2014. **9**(8): p. e106048.
- 467 23. Weldon, D.T., et al., *Fibrillar beta-amyloid induces microglial phagocytosis, expression of*  
468 *inducible nitric oxide synthase, and loss of a select population of neurons in the rat CNS in vivo.* J  
469 Neurosci, 1998. **18**(6): p. 2161-73.
- 470 24. Ma, Q., *Role of nrf2 in oxidative stress and toxicity.* Annu Rev Pharmacol Toxicol, 2013. **53**: p.  
471 401-26.
- 472 25. Nguyen, T., P. Nioi and C.B. Pickett, *The Nrf2-antioxidant response element signaling pathway*  
473 *and its activation by oxidative stress.* J Biol Chem, 2009. **284**(20): p. 13291-5.
- 474 26. Cho, M.H., et al., *Autophagy in microglia degrades extracellular beta-amyloid fibrils and*  
475 *regulates the NLRP3 inflammasome.* Autophagy, 2014. **10**(10): p. 1761-75.
- 476 27. Mizushima, N. and T. Yoshimori, *How to interpret LC3 immunoblotting.* Autophagy, 2007. **3**(6): p.  
477 542-5.
- 478 28. Fujita, K. and S.M. Srinivasula, *TLR4-mediated autophagy in macrophages is a p62-dependent*  
479 *type of selective autophagy of aggresome-like induced structures (ALIS).* Autophagy, 2011. **7**(5):  
480 p. 552-4.
- 481 29. Jarrett, J.T., E.P. Berger and P.T. Lansbury, Jr., *The carboxy terminus of the beta amyloid protein*  
482 *is critical for the seeding of amyloid formation: implications for the pathogenesis of Alzheimer's*  
483 *disease.* Biochemistry, 1993. **32**(18): p. 4693-7.
- 484 30. Muchowski, P.J., G. Schaffar, A. Sittler, E.E. Wanker, M.K. Hayer-Hartl, and F.U. Hartl, *Hsp70 and*  
485 *hsp40 chaperones can inhibit self-assembly of polyglutamine proteins into amyloid-like fibrils.*  
486 Proc Natl Acad Sci U S A, 2000. **97**(14): p. 7841-6.
- 487 31. Meyer-Luehmann, M., et al., *Extracellular amyloid formation and associated pathology in neural*  
488 *grafts.* Nat Neurosci, 2003. **6**(4): p. 370-7.
- 489 32. DiSabato, D.J., N. Quan and J.P. Godbout, *Neuroinflammation: the devil is in the details.* J  
490 Neurochem, 2016. **139 Suppl 2**: p. 136-153.
- 491 33. Streit, W.J., R.E. Mrak and W.S. Griffin, *Microglia and neuroinflammation: a pathological*  
492 *perspective.* J Neuroinflammation, 2004. **1**(1): p. 14.
- 493 34. Streit, W.J., *Microglia and Alzheimer's disease pathogenesis.* J Neurosci Res, 2004. **77**(1): p. 1-8.
- 494 35. Murshid, A., T.J. Borges, C. Bonorino, B.J. Lang, and S.K. Calderwood, *Immunological Outcomes*  
495 *Mediated Upon Binding of Heat Shock Proteins to Scavenger Receptors SCARF1 and LOX-1, and*  
496 *Endocytosis by Mononuclear Phagocytes.* Front Immunol, 2019. **10**: p. 3035.
- 497 36. Murshid, A., J. Theriault, J. Gong, and S.K. Calderwood, *Molecular Chaperone Receptors.*  
498 Methods Mol Biol, 2018. **1709**: p. 331-344.
- 499 37. Theriault, J.R., H. Adachi and S.K. Calderwood, *Role of scavenger receptors in the binding and*  
500 *internalization of heat shock protein 70.* J Immunol, 2006. **177**(12): p. 8604-11.
- 501 38. Tsen, F., et al., *Extracellular heat shock protein 90 signals through subdomain II and the NPVY*  
502 *motif of LRP-1 receptor to Akt1 and Akt2: a circuit essential for promoting skin cell migration in*  
503 *vitro and wound healing in vivo.* Mol Cell Biol, 2013. **33**(24): p. 4947-59.
- 504 39. Zhu, H., X. Fang, D. Zhang, W. Wu, M. Shao, L. Wang, and J. Gu, *Membrane-bound heat shock*  
505 *proteins facilitate the uptake of dying cells and cross-presentation of cellular antigen.* Apoptosis,  
506 2016. **21**(1): p. 96-109.
- 507 40. Frenkel, D., et al., *Scara1 deficiency impairs clearance of soluble amyloid-beta by mononuclear*  
508 *phagocytes and accelerates Alzheimer's-like disease progression.* Nat Commun, 2013. **4**: p. 2030.

- 509 41. Barth, S., D. Glick and K.F. Macleod, *Autophagy: assays and artifacts*. J Pathol, 2010. **221**(2): p.  
510 117-24.
- 511 42. Glick, D., S. Barth and K.F. Macleod, *Autophagy: cellular and molecular mechanisms*. J Pathol,  
512 2010. **221**(1): p. 3-12.
- 513 43. Funderburk, S.F., B.K. Marcellino and Z. Yue, *Cell "self-eating" (autophagy) mechanism in*  
514 *Alzheimer's disease*. Mt Sinai J Med, 2010. **77**(1): p. 59-68.
- 515 44. Mijaljica, D., M. Prescott and R.J. Devenish, *The intriguing life of autophagosomes*. Int J Mol Sci,  
516 2012. **13**(3): p. 3618-35.
- 517 45. Liu, W.J., et al., *p62 links the autophagy pathway and the ubiquitin-proteasome system upon*  
518 *ubiquitinated protein degradation*. Cell Mol Biol Lett, 2016. **21**: p. 29.
- 519 46. Wardyn, J.D., A.H. Ponsford and C.M. Sanderson, *Dissecting molecular cross-talk between Nrf2*  
520 *and NF-kappaB response pathways*. Biochem Soc Trans, 2015. **43**(4): p. 621-6.
- 521 47. Shin, J.Y., H.J. Park, H.N. Kim, S.H. Oh, J.S. Bae, H.J. Ha, and P.H. Lee, *Mesenchymal stem cells*  
522 *enhance autophagy and increase beta-amyloid clearance in Alzheimer disease models*.  
523 *Autophagy*, 2014. **10**(1): p. 32-44.

524

Figure 1

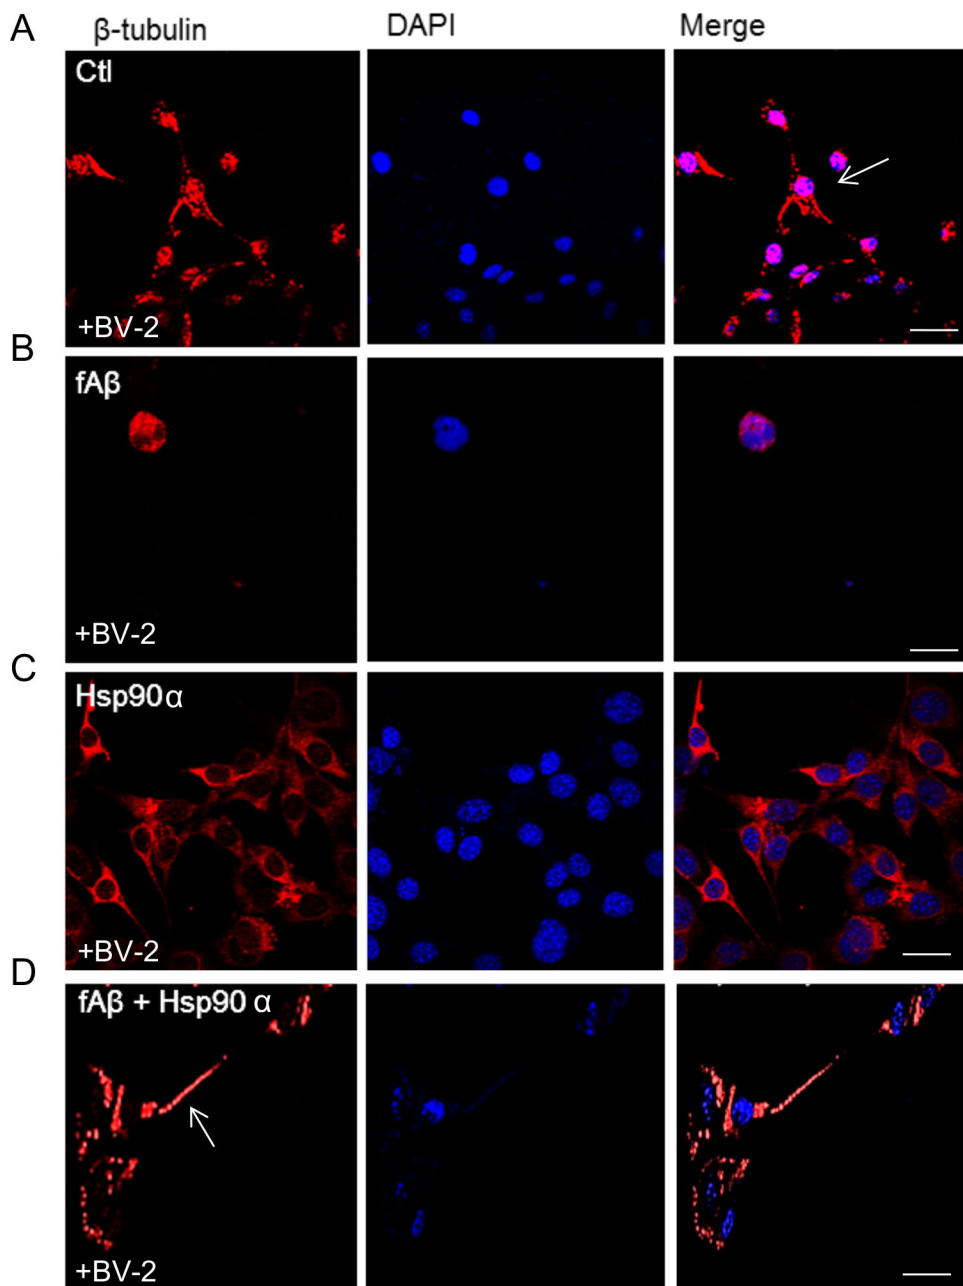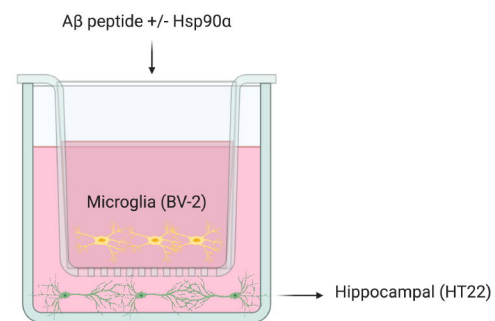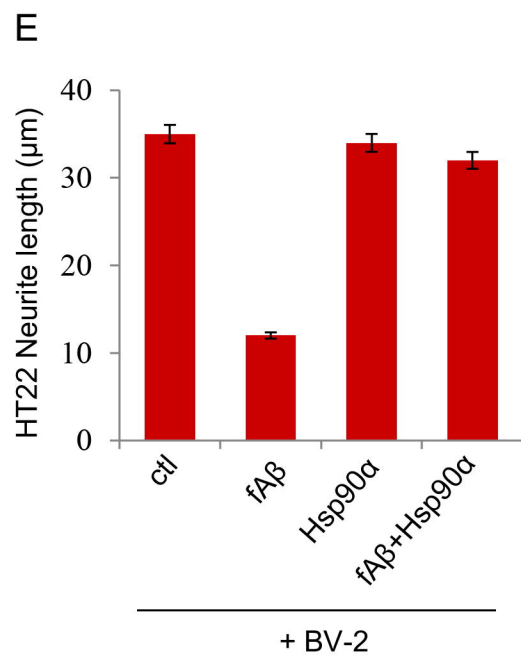



Figure 2

A

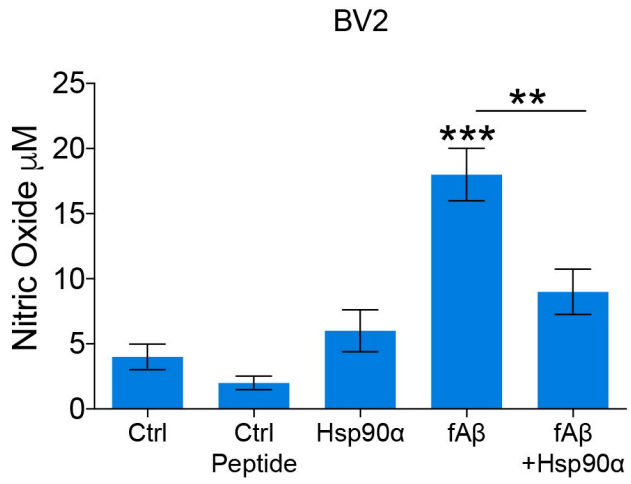

B

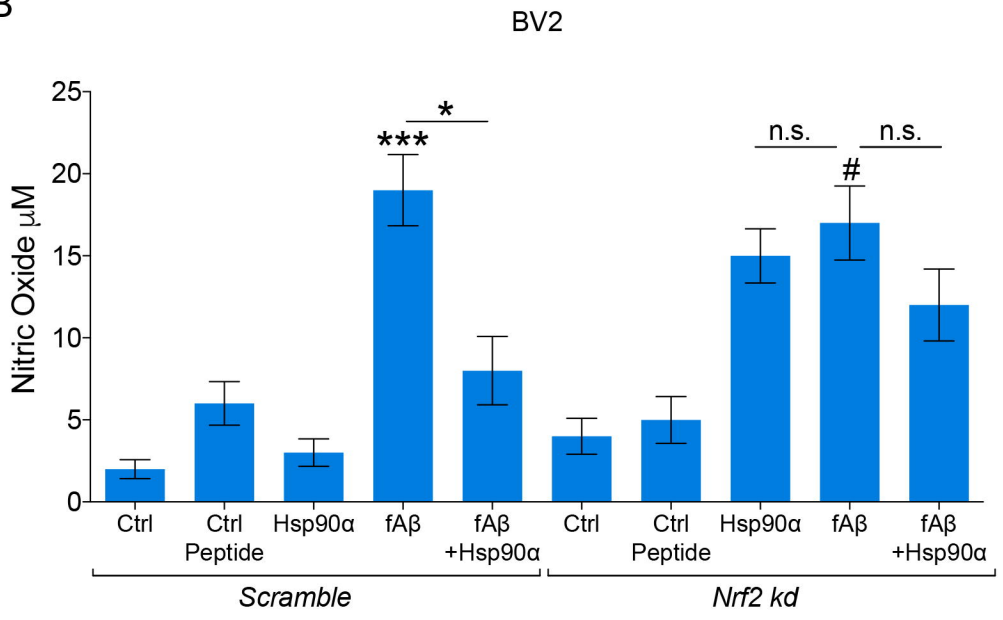

Figure 3

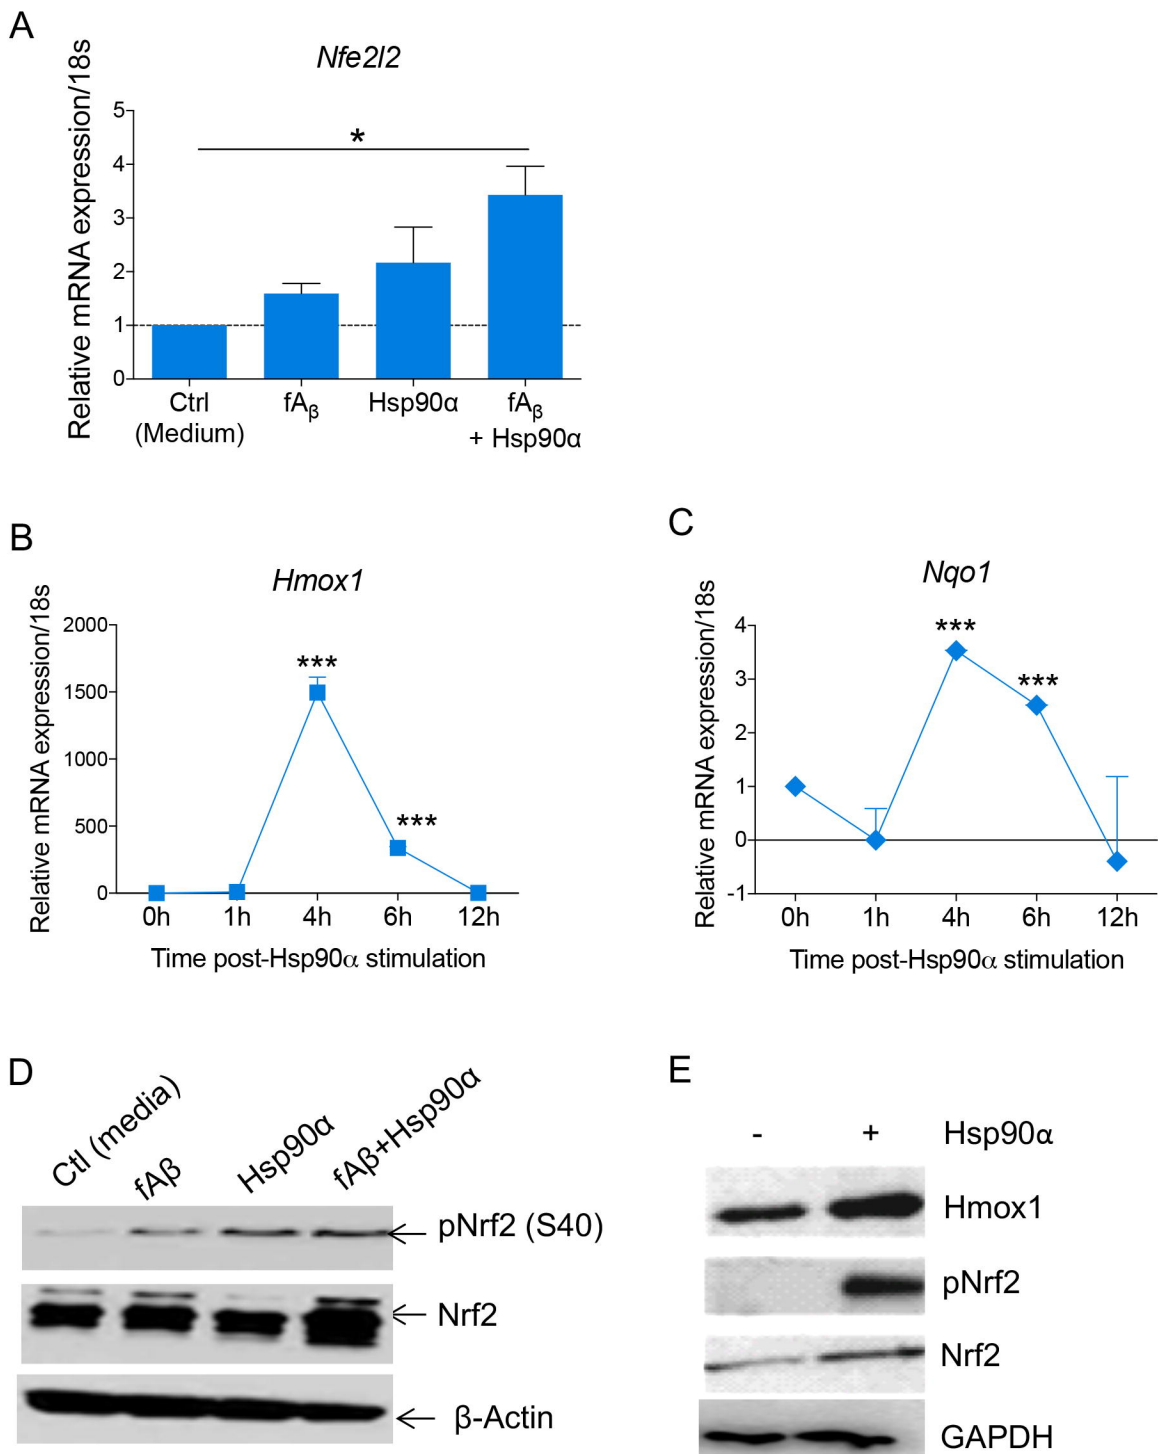

Figure 4

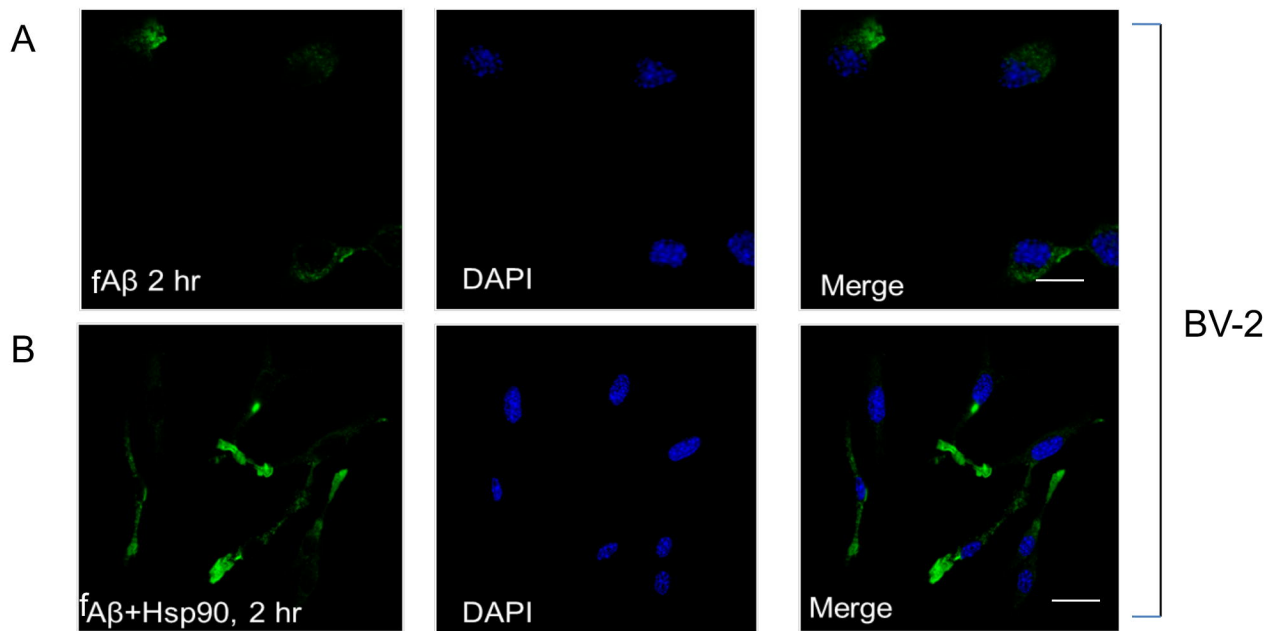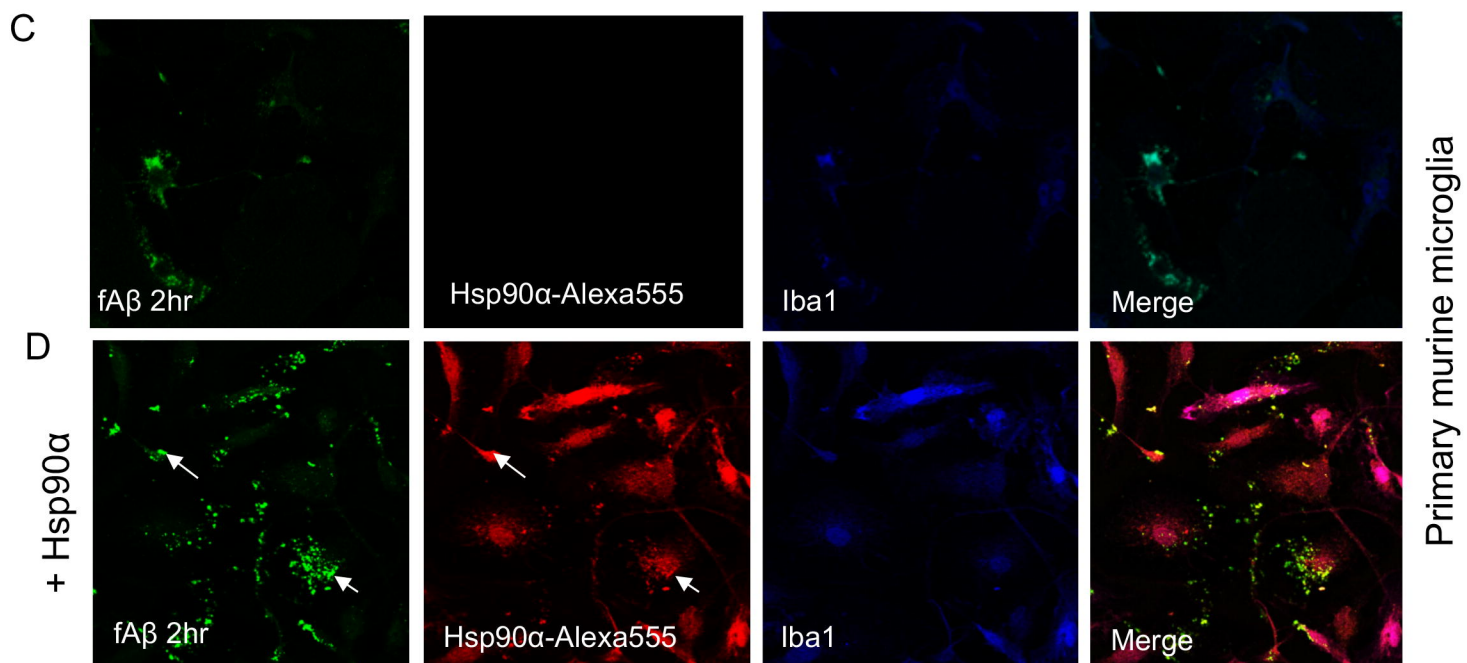

Figure 5

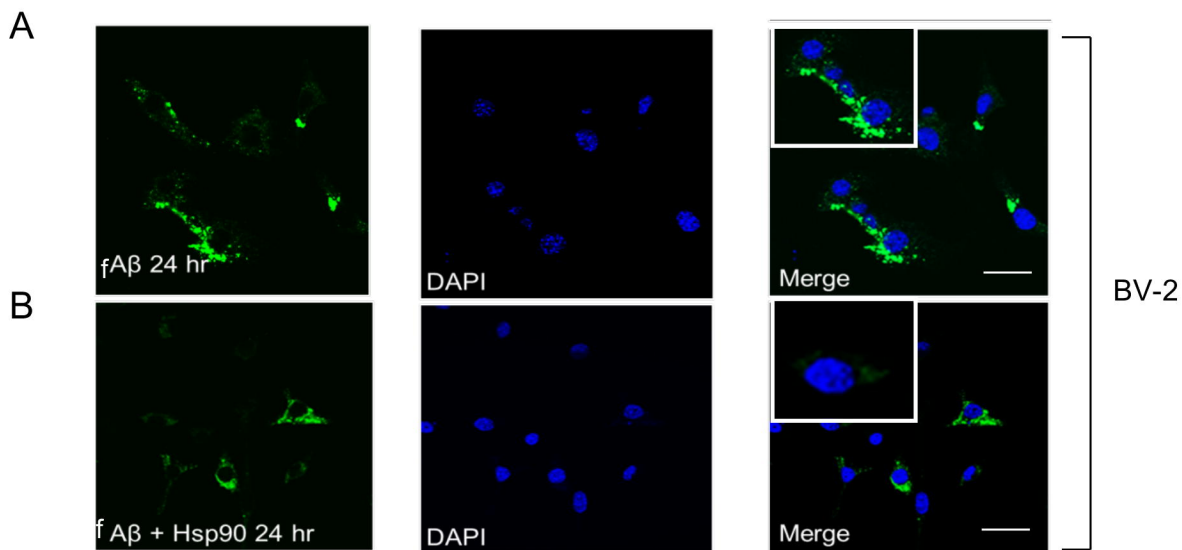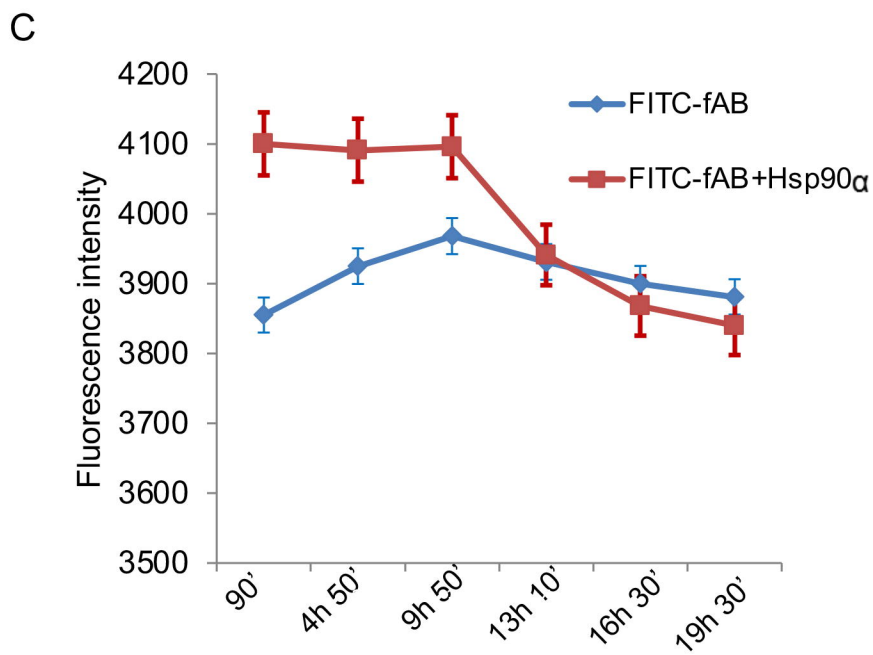

Figure 6

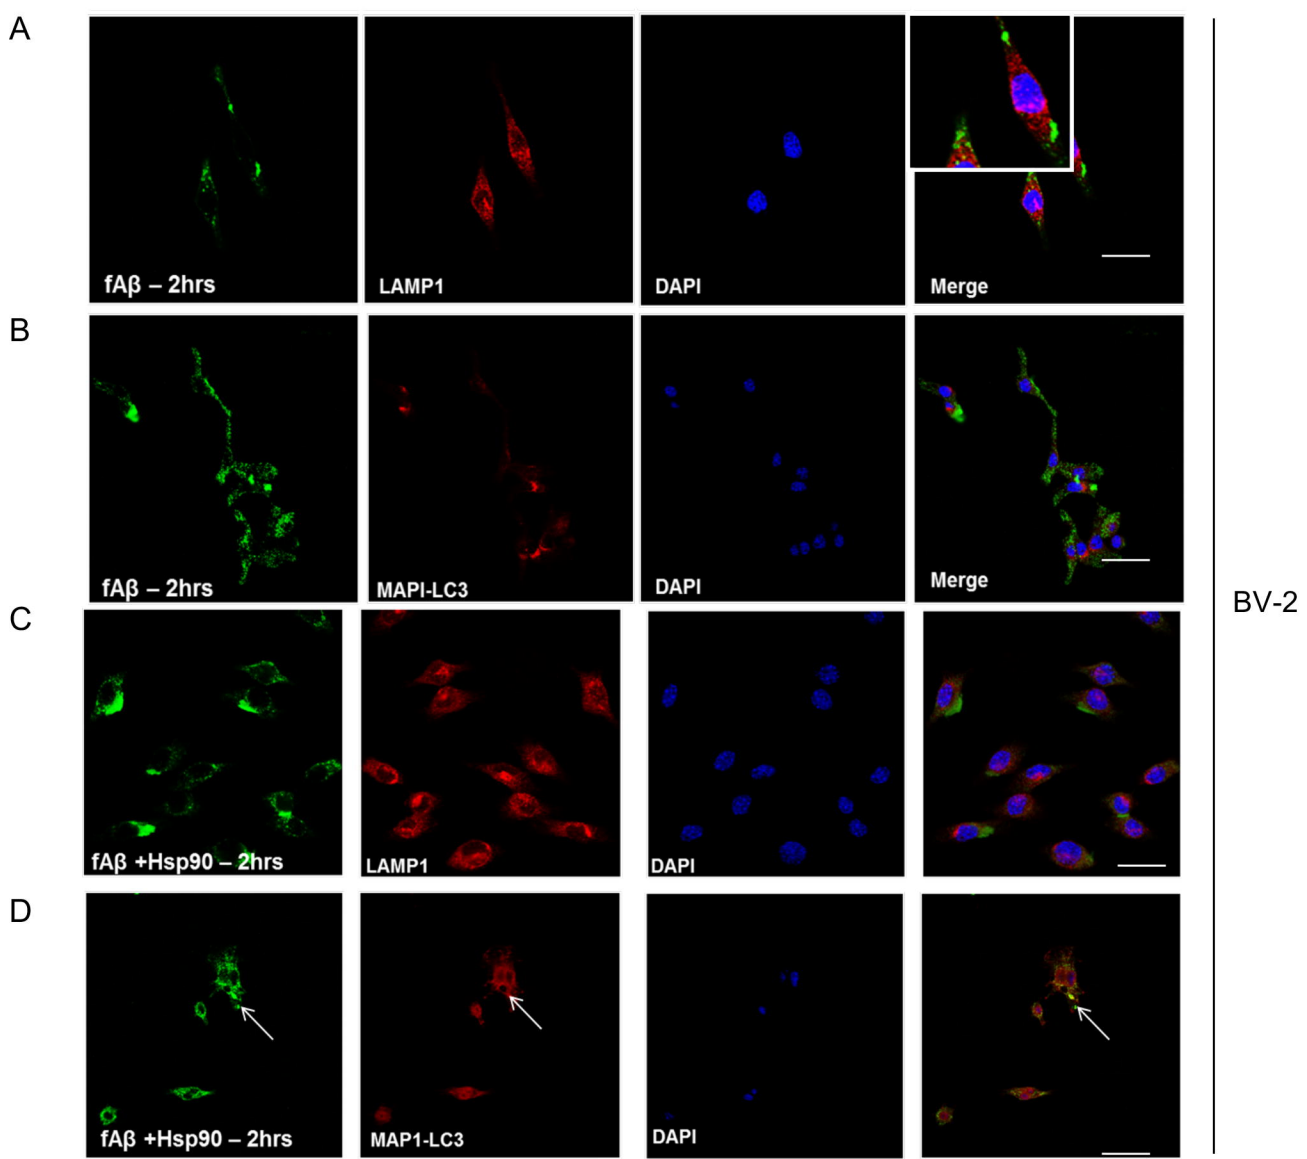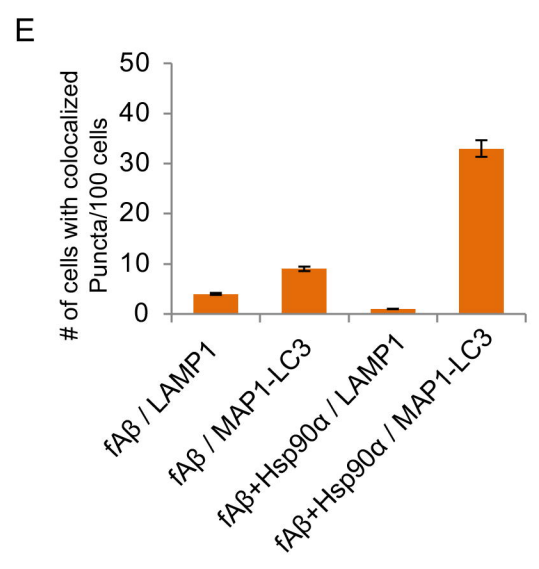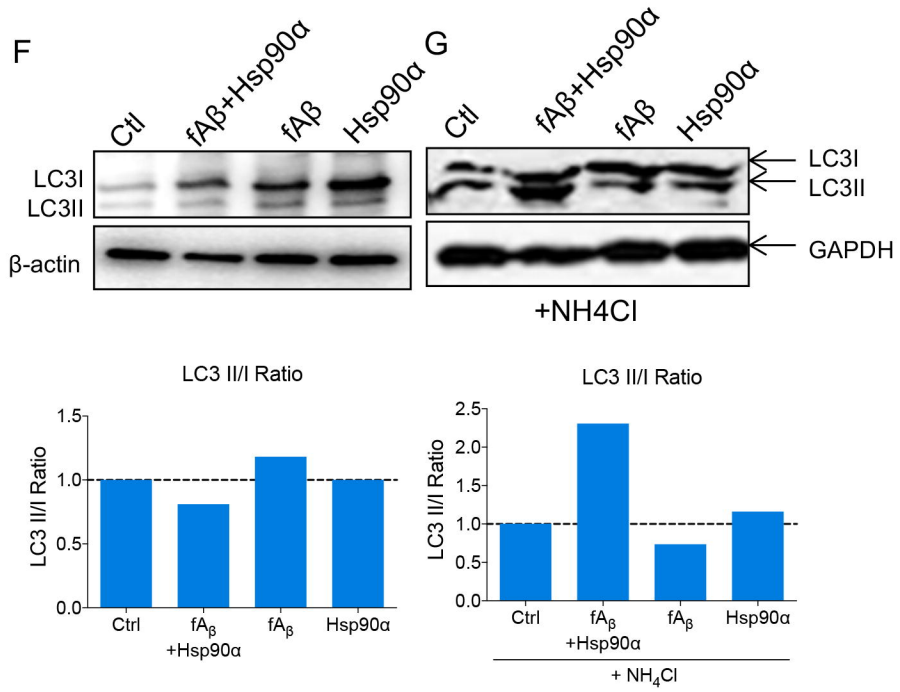

Figure 7

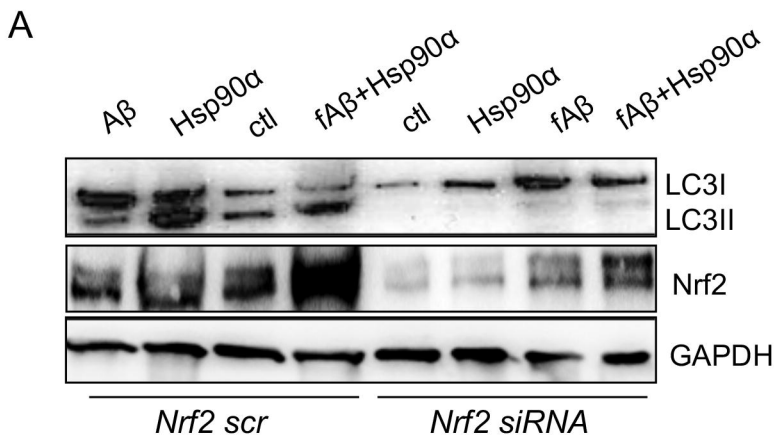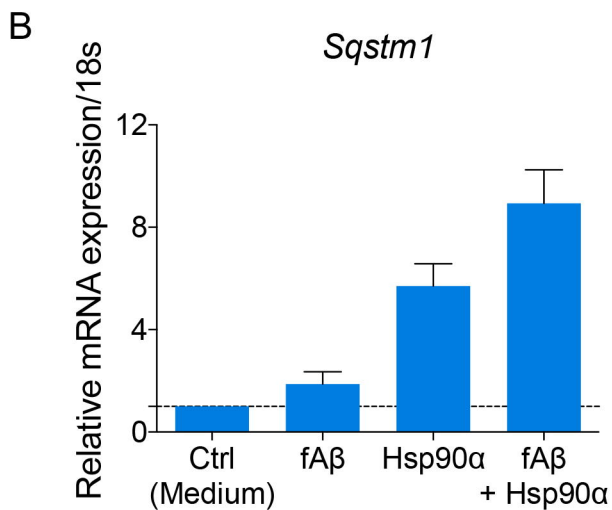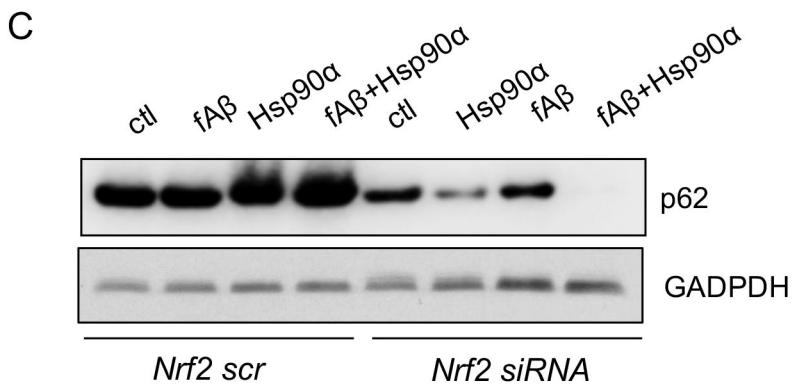

Source: https://biorxiv.org/content/10.1101/2021.04.16.440151v1.full.pdf
